# Supplementary material for: A novel approach to hierarchical sphere-like ZnAl-layered double hydroxides and their enhanced adsorption capability
Source: Royal Society of Chemistry journal article supplement (doi:10.1039/c4ta01028k), 2014-01-01
Supplement: c4ta01028k1.pdf [file c4ta01028k1.pdf]

### Supporting information

**Fig. S1** SEM images of precursors synthesized with different molar ratio of urea to metallic cations (a) 10, (b) 5, (c) 2.5; (d) TG curve of as-obtained precursor-1.

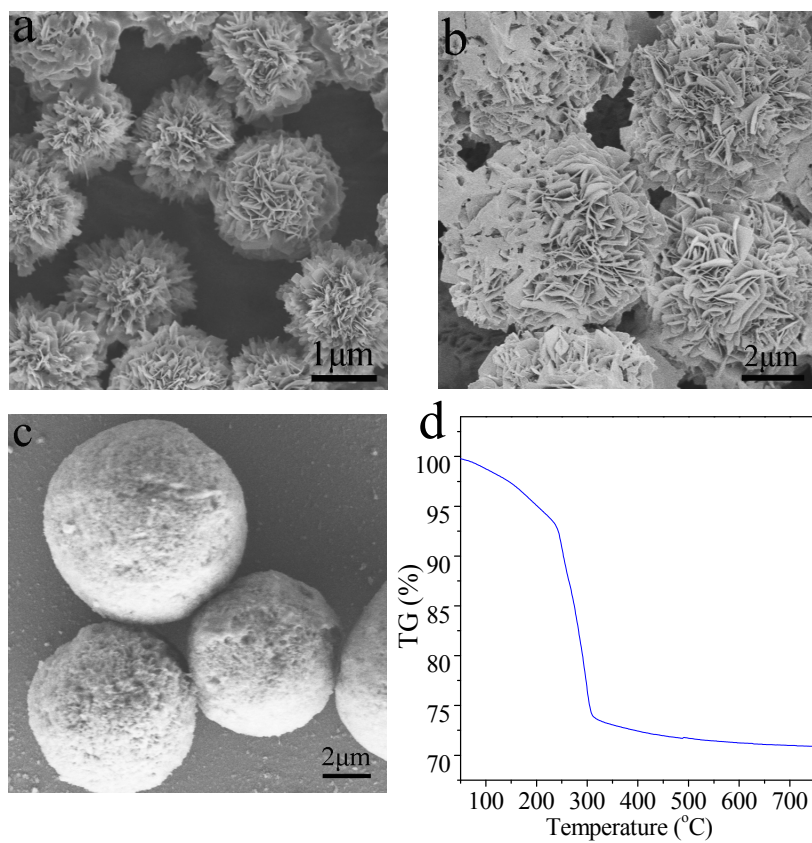

**Fig. S2** XRD patterns of LDH samples synthesized with precursor-1 being calcined at varying temperatures for 4 h.

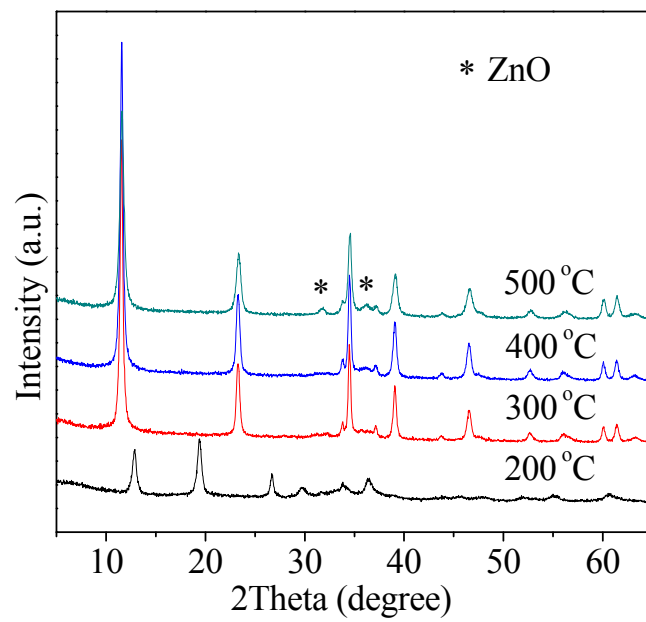

**Fig. S3** SEM images of the precursor-1 calcined at 300 °C with varying heating rate for 4 h: (a, e) 1 °C · min<sup>-1</sup>, (b, f) 5 °C · min<sup>-1</sup>, (c, g) 10 °C · min<sup>-1</sup>, (d, h) 20 °C · min<sup>-1</sup>.

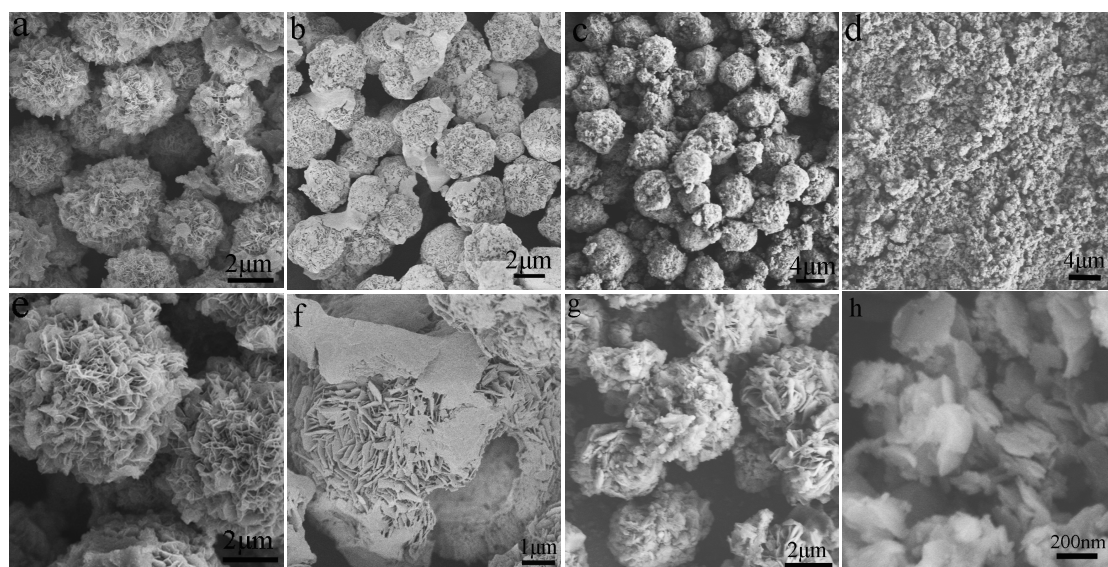

**Fig. S4** XRD patterns of the precipitated mixture synthesized with different reaction time: (a) 2 h; (b) 4 h; (c) 8 h; (d) 24 h.

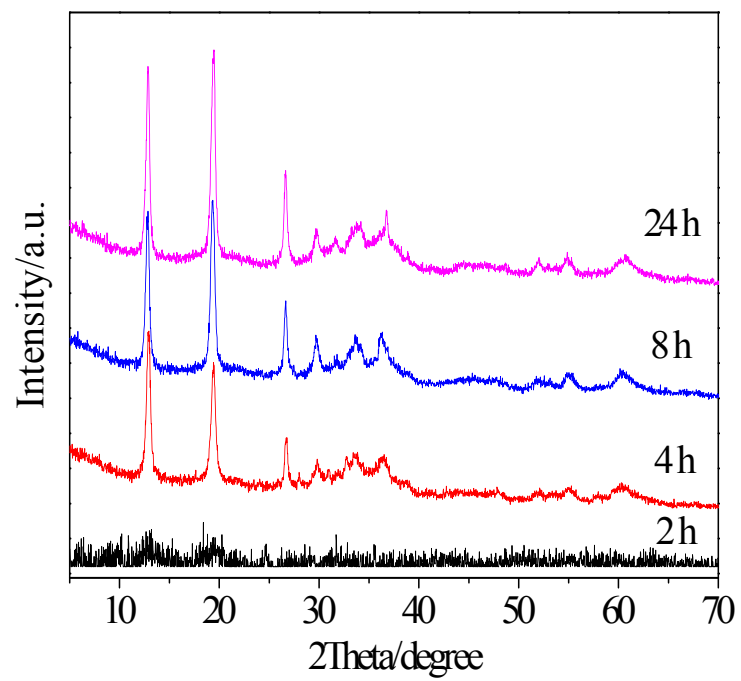

**Fig. S5** XRD pattern and SEM image of sample LDHs synthesized with molar ratio of urea :  $(\text{Zn}^{2+} + \text{Al}^{3+}) = 1$ .

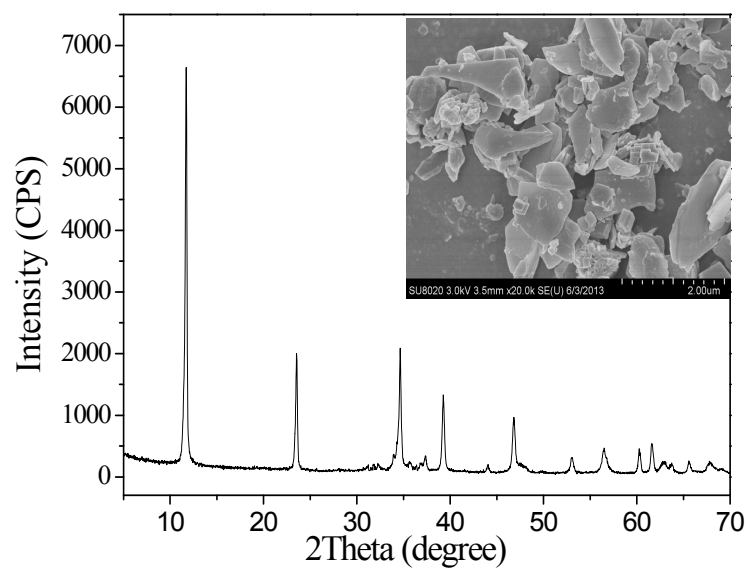

**Fig. S6** Linearized Langmuir adsorption isotherms (a) and Pseudo-second-order kinetics (b) for adsorption of MO onto LDO-1 and LDH-1; (c) XRD patterns of samples obtained with different adsorption time of MO onto LDO-1: (a) 5 min, (b) 30 min, (c) 1 h, (d) 3 h, (e) 8 h, (f) 12 h; (d) FTIR spectra of LDH-1, LDO-1 before and after adsorption of MO.

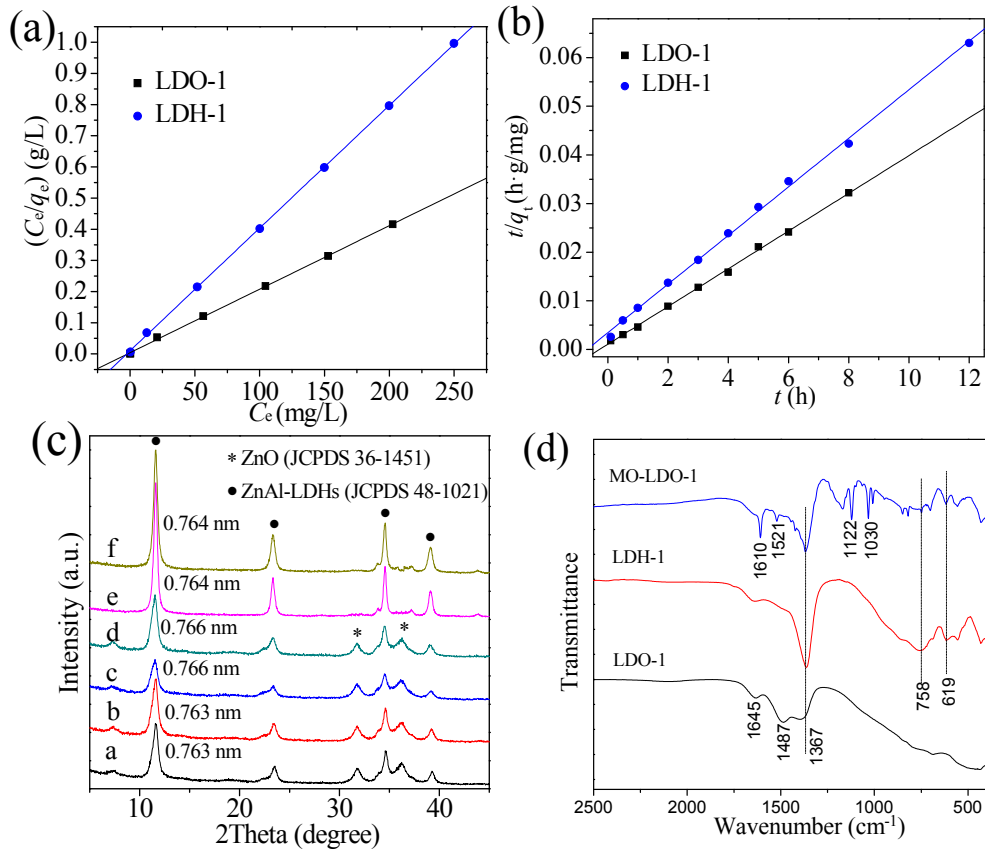

**Table S1** Unit cell parameters and interplanar spacing of ZnAl-LDHs.

| samples | <i>d</i> /nm |       |       |       | <i>a</i> /nm | <i>c</i> /nm |
|---------|--------------|-------|-------|-------|--------------|--------------|
|         | 003          | 006   | 110   |       |              |              |
| LDH-1   | 0.760        | 0.380 | 0.154 | 0.308 | 2.281        |              |
| LDH-2   | 0.759        | 0.379 | 0.154 | 0.308 | 2.277        |              |
| LDH-3   | 0.762        | 0.381 | 0.154 | 0.308 | 2.286        |              |

**Table S2** Langmuir and Freundlich model constants for MO adsorption onto the LDH-1 and LDO-1.

| samples | Langmuir                           |                                     |        | Freundlich |                                    |        |
|---------|------------------------------------|-------------------------------------|--------|------------|------------------------------------|--------|
|         | $q_m(\text{mg}\cdot\text{g}^{-1})$ | $K_L/(\text{L}\cdot\text{mg}^{-1})$ | $R^2$  | $n$        | $K_F/(\text{L}\cdot\text{g}^{-1})$ | $R^2$  |
| LDO-1   | 490.2                              | 0.494                               | 0.9995 | 4.032      | 179.06                             | 0.7982 |
| LDH-1   | 253.8                              | 0.392                               | 0.9998 | 3.636      | 74.64                              | 0.9313 |

**Table S3** Constants of pseudo-first-order kinetic model and the pseudo-second-order kinetic model for adsorption of MO onto LDH-1 and LDO-1 samples.

| samples | $q_{e,\text{exp}}/(\text{mg}\cdot\text{g}^{-1})$ | Pseudo-second order                              |                                    |        | Pseudo-first order |        |
|---------|--------------------------------------------------|--------------------------------------------------|------------------------------------|--------|--------------------|--------|
|         |                                                  | $q_{e,\text{cal}}/(\text{mg}\cdot\text{g}^{-1})$ | $k_2 \times 10^{-2}/\text{h}^{-1}$ | $R^2$  | $R^2$              |        |
| LDO-1   | 248.34                                           | 263.16                                           | 1.444                              | 0.9985 |                    | 0.9058 |
| LDH-1   | 190.35                                           | 204.08                                           | 0.706                              | 0.9980 |                    | 0.8824 |
